# Supplementary material
Source: PubMed Central journal article supplement (PMC5841145)
Supplement: brain-2017-00849-file007_awx275.pdf [file brain-2017-00849-file007_awx275.pdf]

# Supplementary Data

## Synaptic phosphorylated $\alpha$ -synuclein in dementia with Lewy bodies

Martí Colom-Cadena, Jordi Pegueroles, Abigail G. Herrmann, Christopher M. Henstridge, Laia Muñoz, Marta Querol-Vilaseca, Carla San Martin, Joan Luque-Cabecerans, Jordi Clarimon, Olivia Belbin, Raúl Núñez-Llaves, Rafael Blesa, Colin Smith, Chris-Anne McKenzie, Matthew P. Frosch, Allyson Roe, Juan Fortea, Jordi Andilla, Pablo Loza-Alvarez, Ellen Gelpi, Bradley T. Hyman, Tara L. Spires-Jones, Alberto Lleó

**Supplementary Table 1.** The Medical Research Council (MRC) Edinburgh Brain & Tissue Bank cases.

| Case     | BNN<br>Number |
|----------|---------------|
| SD063/13 | 19686         |
| SD024/15 | 26495         |
| SD056/14 | 24527         |
| SD005/16 | 28410         |
| SD010/16 | 28771         |

MRC numbers and associated BNN numbers.

**Supplementary Figure 1.** Distribution of non-phosphorylated and phosphorylated  $\alpha$ -synuclein in dementia with Lewy bodies and controls.

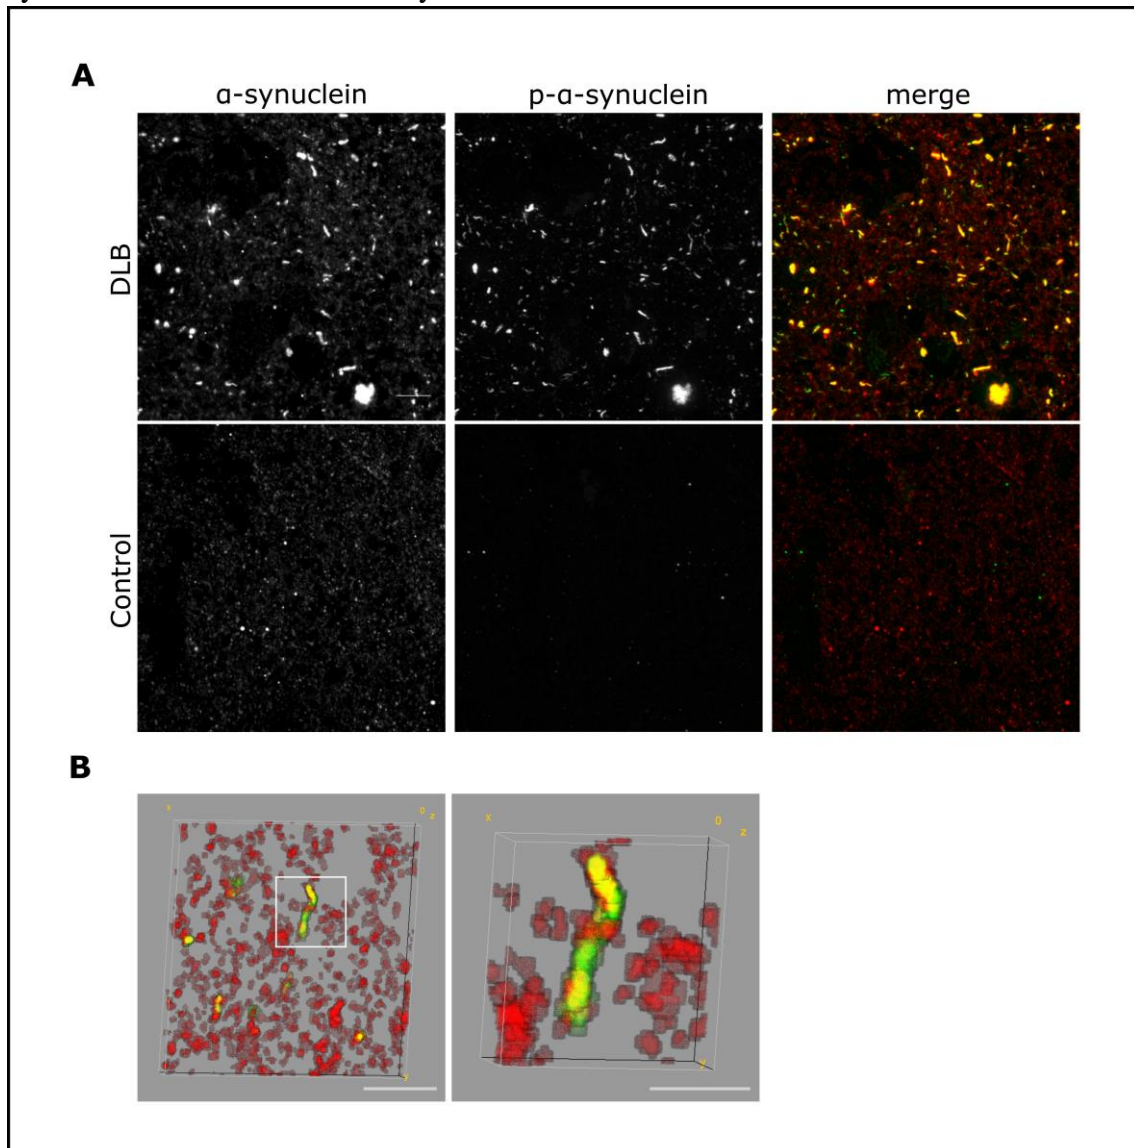

**A** Representative images of brain sections of a case with dementia with Lewy bodies and a control case stained with antibodies against non-phosphorylated  $\alpha$ -synuclein (red) and p- $\alpha$ -synuclein (green). Each image is a maximum intensity projection of 20 consecutive sections. **B** Three dimensional representation of non-phosphorylated alpha-synuclein (red) and p- $\alpha$ -synuclein (green) aggregates found in DLB cases. An inset of the low magnification image is shown on the right. Abbreviations: DLB, dementia with Lewy bodies. Scale bar in A, 10 $\mu$ m; in B, 5 $\mu$ m (left) and 2 $\mu$ m (right).

**Supplementary Figure 2.** Segmentation and co-localization examples.

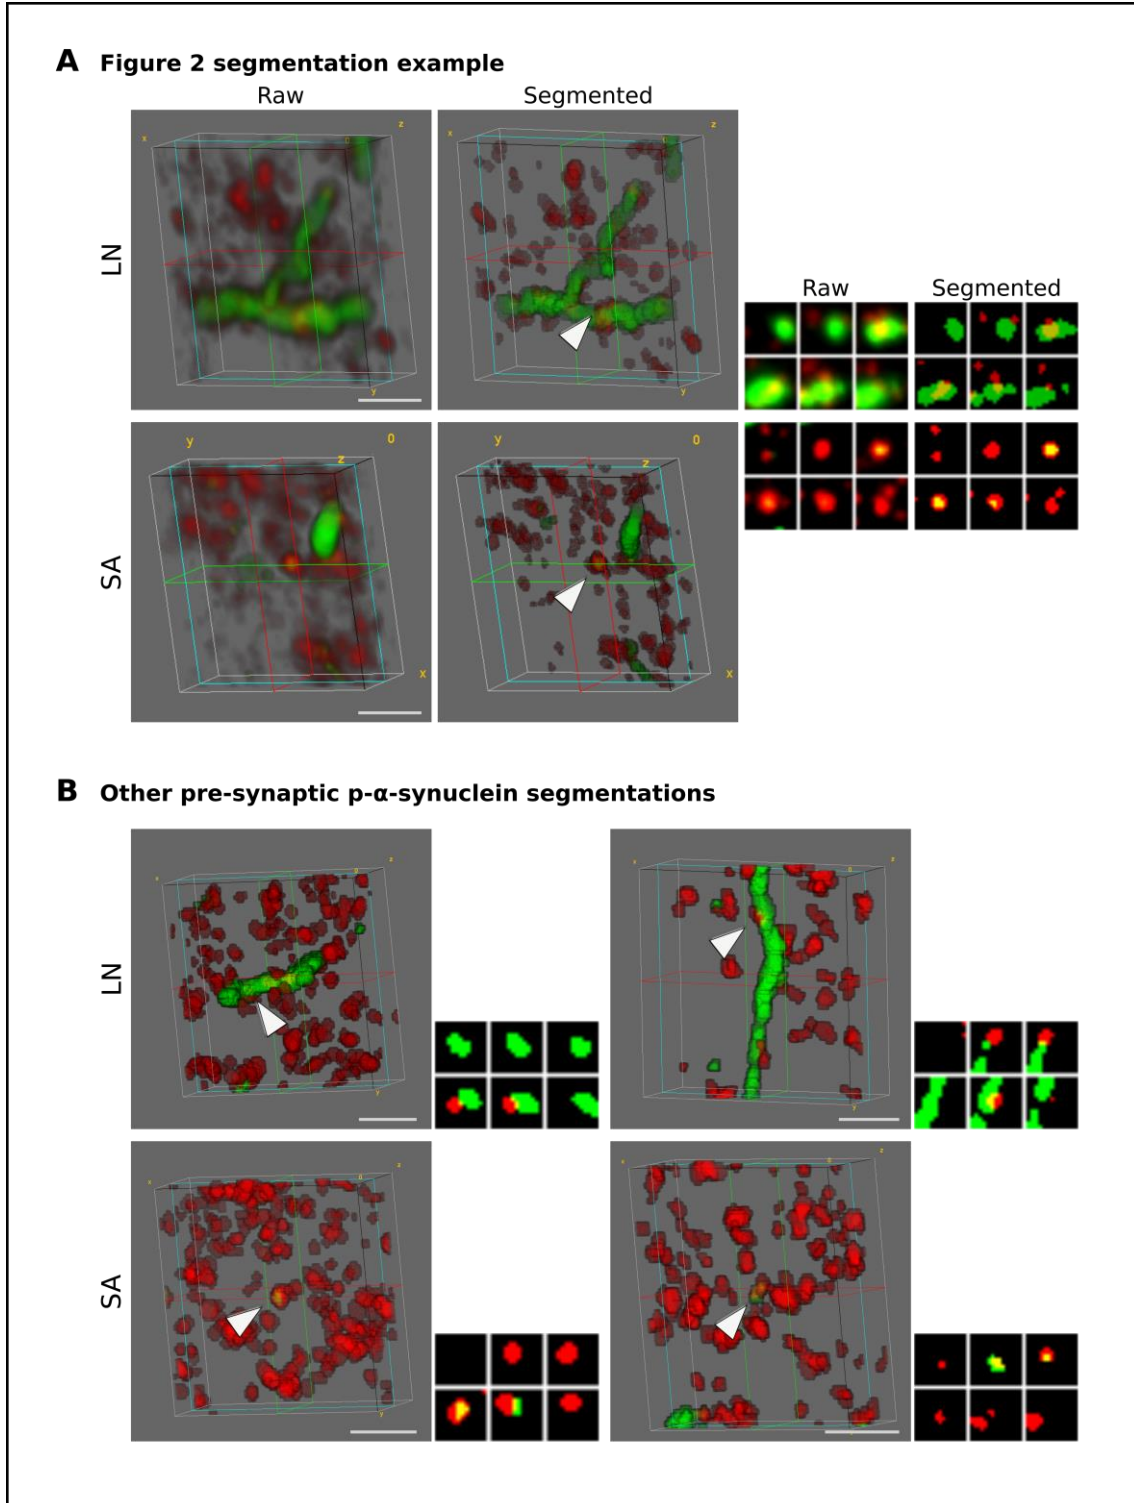

**A** Three dimensional representations of the images shown in Figure 2 as well as synaptograms representing six 70nm consecutive sections (from left to right and top to bottom) of a Lewy neurite (LN) or a small aggregate (SA) (green) colocalizing with synaptophysin (red) pointed by the arrowheads. Both the raw and segmented images are shown. **B** 3D examples of other segmented Lewy neurites and small aggregates. Synaptograms on the bottom-right represent a magnification of the pointed area. Abbreviations: LN, Lewy neurite; SA, Small aggregate. Scale bars in A and B, 2 $\mu$ m.

**Supplementary Figure 3.** Pre-synaptic localization of p- $\alpha$ -synuclein and synapsin I in DLB.

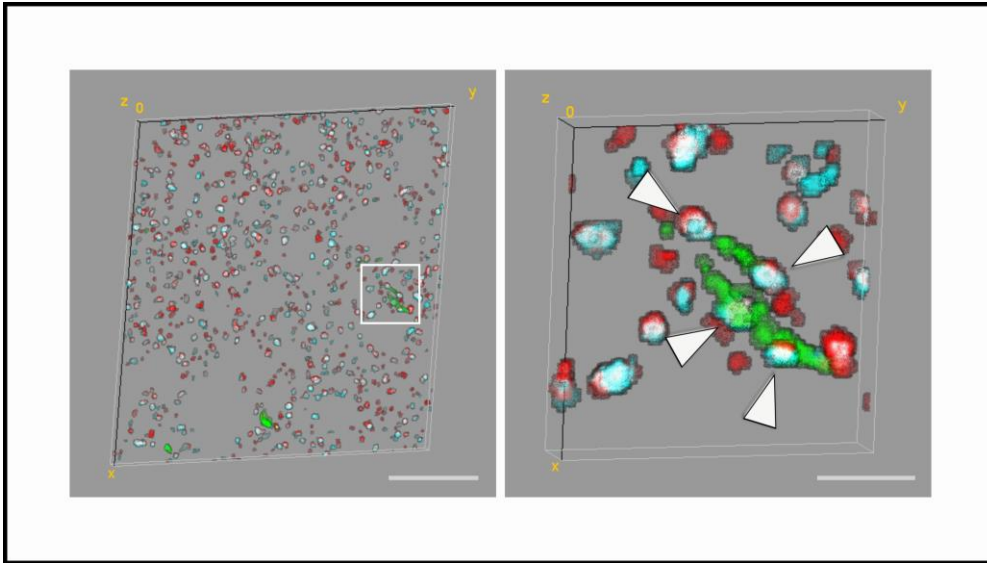

**A** Three dimensional reconstruction of 20 consecutive sections from a DLB case. P- $\alpha$ -synuclein (green), synaptophysin (red) and synapsin I (blue) are shown. An inset of the low magnification image is shown on the right. Arrowheads indicate objects with co-localization of all three markers. Scale bars 10 $\mu$ m (left) and 2 $\mu$ m (right).
